# Supplementary material for: Fractalkine-CX3CR1 signaling is critical for progesterone-mediated neuroprotection in the retina
Source: PubMed Central journal article supplement (PMC5316933; doi:10.1038/srep43067), 2017-02-20
Supplement: srep43067-s1.pdf [file srep43067-s1.pdf]

Supplementary Files

**Fractalkine-CX3CR1 signaling is critical for progesterone-mediated  
neuroprotection in the retina**

Sarah L Roche<sup>1</sup>, Alice C Wyse-Jackson<sup>1</sup>, Ana M Ruiz-Lopez<sup>1</sup>, Ashleigh M Byrne<sup>1</sup> and Thomas G  
Cotter<sup>1\*</sup>

## Negative Controls

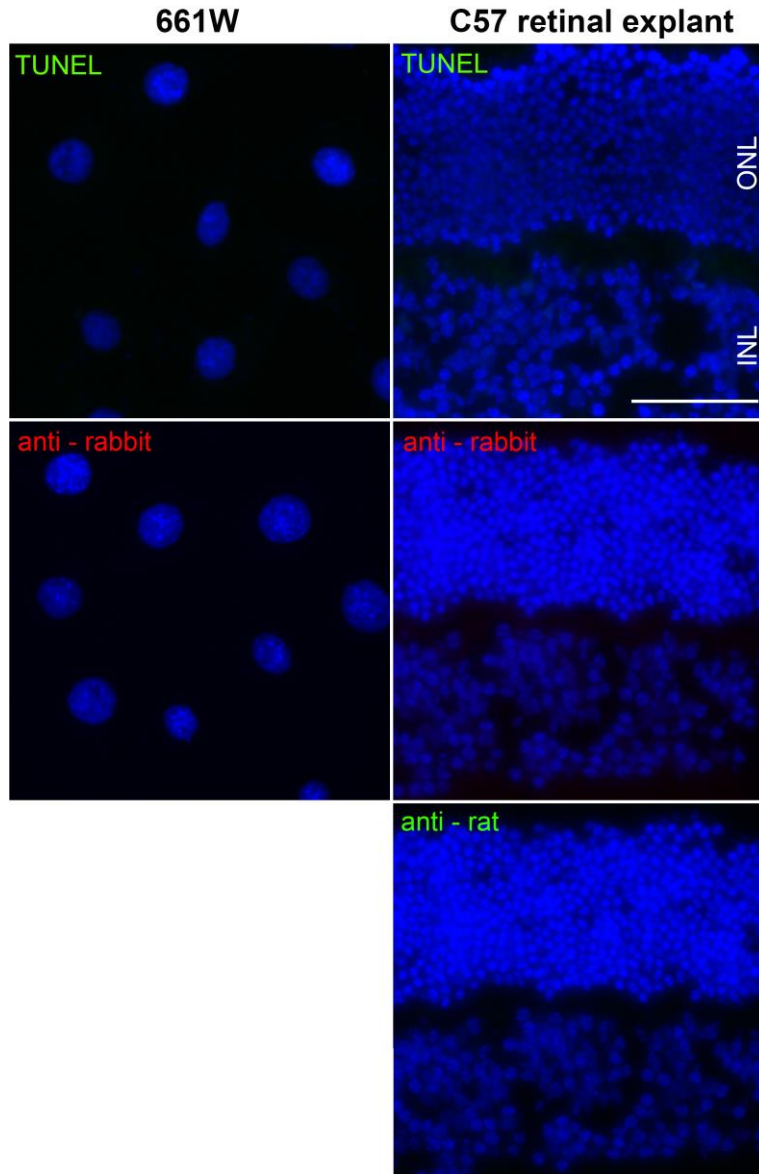

**Supplementary Figure S1.** Example images of negative controls for TUNEL (elimination of TdT enzyme) and immunofluorescence (elimination of secondary antibody) in 661W cells and C57 retinal explants. Scale bar 50 $\mu$ m.
